# Supplementary material
Source: ML conference proceedings conference paper supplement (https://proceedings.mlr.press/v97/bojchevski19a.html)
Supplement: Supplementary file [file bojchevski19a-supp.pdf]

## 6. Appendix

### 6.1. Proofs and Derivations

*Proof. Theorem 1.* Applying eigenvalue perturbation theory we obtain that  $\lambda'_p = \lambda_p + u_p^T(\Delta\hat{M})u_p$  where  $\lambda'_p$  is the eigenvalue of  $\hat{M}'$  based on  $A'$  obtained after perturbing the graph. Using the fact that  $\lambda_p = u_p^T\hat{M}u_p$ , and the fact that singular values are equal to the absolute value of the corresponding eigenvalues we obtain the desired result.  $\square$

*Proof. Theorem 2.* Denote with  $e_i$  the vector of all zeros and a single one at position  $i$ . Then, we have  $\Delta A = \Delta w_{ij}(e_i e_j^T + e_j e_i^T)$  and  $\Delta D = \Delta w_{ij}(e_i e_i^T + e_j e_j^T)$ . From eigenvalue perturbation theory (Stewart, 1990), we get:  $\lambda'_y \approx \lambda_y + u_y^T(\Delta A - \lambda_y \Delta D)u_y$ . Substituting  $\Delta A/\Delta D$  concludes the proof.  $\square$

We include an immediate result to prove Theorem 3.

**Lemma 4.** Consider the generalized eigenvalue problem  $Au = \lambda Du$  and suppose that we have the changes in the respective matrices/vectors:  $\Delta A, \Delta D$  and  $\Delta \lambda$ , then the change in the eigenvectors  $\Delta u$  can be expressed as:

$$\Delta u = -(A - \lambda D)^+ \left( \Delta A - \Delta \lambda D - \lambda \Delta D \right) u$$

*Proof. Theorem 3.* Let  $\Delta A$  and  $\Delta D$  be defined as in Theorem 2 and let  $\Delta \lambda$  be the change in the eigenvalues as computed in Theorem 2. Plugging these terms in Lemma 4 and simplifying we obtain the result.  $\square$

We include an intermediate result to prove Lemmas 2 and 3.

**Lemma 5.**  $\lambda$  is an eigenvalue of  $D^{-1/2}AD^{-1/2} := A_{norm}$  with eigenvector  $\hat{u} = D^{1/2}u$  if and only if  $\lambda$  and  $u$  solve the generalized eigen-problem  $Au = \lambda Du$ .

*Proof. Lemma 5.* We have  $Az = \lambda Dz \implies (Q^{-1}AQ^{-T})(Q^T z) = \lambda(Q^T z)$  for any real symmetric  $A$  and any positive definite  $D$ , where  $D = QQ^T$  using the Cholesky factorization. Substituting the adjacency/degree matrix and using  $Q = Q^T = D^{1/2}$  we obtain the result.  $\square$

*Proof. Lemma 2.*  $S$  is equal to a product of three matrices  $S = D^{-1/2}(\hat{U}(\sum_{r=1}^T \hat{\Lambda}^r)\hat{U}^T)D^{-1/2}$  where  $\hat{U}\hat{\Lambda}\hat{U}^T = D^{-1/2}AD^{-1/2} =: A_{norm}$  is the eigenvalue decomposition of  $A_{norm}$  (Qiu et al. (2018)). From Lemma 5 we have the fact that  $\lambda$  is an eigenvalue of  $D^{-1/2}AD^{-1/2}$  with eigenvector  $\hat{u} = D^{1/2}u$  if and only if  $\lambda$  and  $u$  solve the generalized eigen-problem  $Au = \lambda Du$ . Substituting  $\hat{\Lambda} = \Lambda$  and  $\hat{U} = D^{1/2}U$  in  $S$ , and use the fact that  $D$  is diagonal.  $\square$

*Proof. Lemma 3.* Following (Qiu et al., 2018), the singular values of  $S$  can be bounded by  $\sigma_p(S) \leq$

$\frac{1}{d_{min}} \left| \sum_{r=1}^T (\hat{\mu}_{\pi(p)})^r \right|$  where  $\mu$  are the (standard) eigenvalues of  $A_{norm}$ . Using Lemma 5, the same bound applies using the generalized eigenvalues  $\lambda_p$  of  $A$ . Now using Theorem 2, we obtain  $\tilde{\lambda}'_p$  an approximation of the  $p$ -th generalized eigenvalue of  $A'$ . Plugging it into the singular value bound we obtain:  $\sigma_p(S) \leq \frac{1}{d_{min}} \left| \sum_{r=1}^T (\tilde{\lambda}'_{\pi(p)})^r \right|$  which concludes the proof.  $\square$

Please note that the permutation  $\pi$  does not need to be computed/determined explicitly. In practice, for every  $\tilde{\lambda}'_p$ , we compute the term  $\left| \sum_{r=1}^T (\tilde{\lambda}'_p)^r \right|$ . Afterwards, these terms are simply sorted.

### 6.2. Analysis of Spectral Embedding Methods

**Attacking spectral embedding.** Finding the spectral embedding is equivalent to the following trace minimization problem:

$$\min_{Z \in \mathbb{R}^{|\mathcal{V}| \times K}} Tr(Z^T L_{xy} Z) = \sum_{i=1}^K \lambda_i(L_{xy}) = \mathcal{L}_{SC} \quad (4)$$

subject to orthogonality constraints, where  $L_{xy}$  is the graph Laplacian. The solution is obtained via the eigen-decomposition of  $L$ , with  $Z^* = U_K$  where  $U_K$  are the  $K$ -first eigen-vectors corresponding to the  $K$ -smallest eigenvalues  $\lambda_i$ . The Laplacian is typically defined in three different ways: the unnormalized Laplacian  $L = D - A$ , the normalized random walk Laplacian  $L_{rw} = D^{-1}L = I - D^{-1}A$  and the normalized symmetric Laplacian  $L_{sym} = D^{-1/2}LD^{-1/2} = I - D^{-1/2}AD^{-1/2} = I - A_{norm}$ , where  $A, D, A_{norm}$  are defined as before.

**Lemma 6** ((von Luxburg, 2007)).  $\lambda$  is an eigenvalue of  $L_{rw}$  with eigenvector  $u$  if and only if  $\lambda$  is an eigenvalue of  $L_{sym}$  with eigenvector  $w = D^{1/2}u$ . Furthermore,  $\lambda$  is an eigenvalue of  $L_{rw}$  with eigenvector  $u$  if and only if  $\lambda$  and  $u$  solve the generalized eigen-problem  $Lu = \lambda Du$ .

From Lemma 6 we see that we can attack both normalized versions of the graph Laplacian with a single attack strategy since they have the same eigenvalues. It also helps us to do that efficiently similar to our previous analysis (Theorem. 3).

**Theorem 4.** Let  $L_{rw}$  (or equivalently  $L_{sym}$ ) be the initial graph Laplacian before performing a flip and  $\lambda_y$  and  $u_y$  be any eigenvalue and eigenvector of  $L_{rw}$ . The eigenvalue  $\lambda'_y$  of  $L'_{rw}$  obtained after flipping a single edge  $(i, j)$  is

$$\lambda'_y \approx \lambda_y + \Delta w_{ij}((u_{yi} - u_{yj})^2 - \lambda_y(u_{yi}^2 + u_{yj}^2)) \quad (5)$$

where  $u_{yi}$  is the  $i$ -th entry of the vector  $u_y$ .

*Proof.* From Lemma 6 we can estimate the change in  $L_{rw}$  (or equivalently  $L_{sym}$ ) by estimating the eigenvalues solving the generalized eigen-problem  $Lu = \lambda Du$ . Let

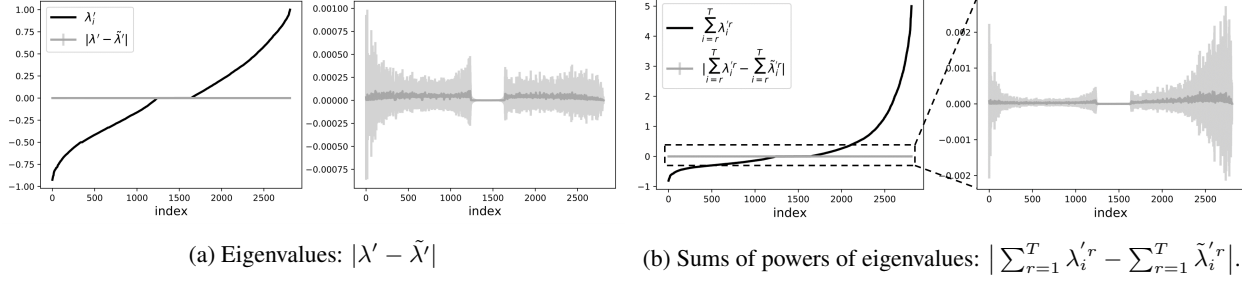

Figure 6: Comparison between the true eigenvalues  $\lambda'$  after performing a flip (i.e. doing a full eigen-decomposition) and our approximation  $\tilde{\lambda}'$ . Since the difference is several orders of magnitude smaller than the eigenvalues (sums of powers of eigenvalues resp.) themselves, we show a “zoomed-in” view (note the difference in the scale on the y-axis). In each subplot on the right side we show the average absolute difference and the standard deviation across the 5K randomly selected flips.

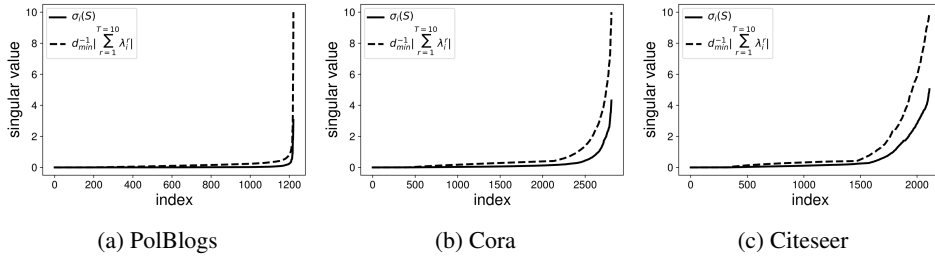

Figure 7: The singular value of  $S$  and our upper bound  $d_{min}^{-1} |\sum_{r=1}^T \lambda_i^r| \geq \sigma_i(S)$  for different graphs.

$\Delta L = L' - L$  be the change in the unnormalized graph Laplacian after performing a single edge flip  $(i, j)$  and  $\Delta D$  be the corresponding change in the degree matrix. Let  $e_i$  be defined as before. Then  $\Delta L = (1 - 2A_{ij})(e_i - e_j)(e_i - e_j)^T$  and  $\Delta D = (1 - 2A_{ij})(e_i e_i^T + e_j e_j^T)$ . Based on the theory of eigenvalue perturbation we have  $\lambda'_y \approx \lambda_y + u_y^T (\Delta L - \lambda_y \Delta D) u_y$ . Finally, we substitute  $\Delta L$  and  $\Delta D$ .  $\square$

Using now Theorem 4 and Eq. 4 we finally estimate the loss of the spectral embedding after flipping an edge  $\mathcal{L}_{SC}(L'_{rw}, Z) \approx \sum_{p=1}^K \lambda'_p$ . Note that here we are summing over the  $K$ -first *smallest* eigenvalues. We see that spectral embedding and the random walk based approaches are indeed very similar.

**Theorem 5.** *Let  $L$  be the initial unnormalized graph Laplacian before performing a flip and  $\lambda_y$  and  $u_y$  be any eigenvalue and eigenvector of  $L$ . The eigenvalue  $\lambda'_y$  of  $L'$  obtained after flipping a single edge  $(i, j)$  can be approximated by:*

$$\lambda'_y \approx \lambda_y - (1 - 2A_{ij})(u_{yi} - u_{yj})^2 \quad (6)$$

*Proof.* Let  $\Delta A = A' - A$  be the change in the adjacency matrix after performing a single edge flip  $(i, j)$  and  $\Delta D$  be the corresponding change in the degree matrix. Let  $e_i$  be defined as before. Then  $\Delta L = L' - L = (D + \Delta D) - (A + \Delta A) - (D - A) = \Delta D - \Delta A = (1 - 2A_{ij})(e_i e_i^T + e_j e_j^T - (e_i e_j^T + e_j e_i^T))$ . Based on the theory of eigenvalue

perturbation we have  $\lambda'_y \approx \lambda_y + u_y^T (\Delta L) u_y$ . Substituting  $\Delta L$  and re-arranging we get the above results.  $\square$

### 6.3. Approximation Quality

**Approximation quality of the eigenvalues.** We randomly select 5K candidate edge flips (Cora) and we compare the true eigenvalues  $\lambda'$  after performing a flip (i.e. doing a full eigen-decomposition) and our approximation  $\tilde{\lambda}'$  obtained from Theorem 2. We can see in Fig. 6a that the average absolute difference  $|\lambda' - \tilde{\lambda}'|$  across the 5K randomly selected flips and the standard deviation are negligible: several orders of magnitude smaller than the eigenvalues themselves. The difference between the terms  $|\sum_{r=1}^T \lambda_i'^r - \sum_{r=1}^T \tilde{\lambda}_i'^r|$  used in Lemma 3 is similarly negligible as shown in Fig. 6b.

**Upper bound on the singular values.** Lemma 3 shows that  $\mathcal{L}_{DW3}$  is an upper bound on  $\mathcal{L}_{DW1}$  (excluding the elementwise logarithm). For a better understanding of the tightness of the bound we visualize the true singular values  $\sigma_i(S)$  of the matrix  $S$  and their respective upper bounds  $d_{min}^{-1} |\sum_{r=1}^T \lambda_i^r| \geq \sigma_i(S)$  obtained by applying Lemma 3 for all datasets. As we can see in Fig. 7, the gap is different across the different graphs and it is relatively small overall.

These results together (Fig. 6 and Fig. 7) demonstrate that we have obtained a good approximation of both the eigenvalues and the singular values, leading to a good overall approximation of the loss.
